# Supplementary material
Source: publisher site journal article supplement (https://www.dovepress.com/get_supplementary_file.php?f=435650.xlsx)
Supplement: Supplementary file 1 [file get_supplementary_file.php]

## Sheet: Supplementary Table1
Supplementary Table 1: The information of three biomarkers by qRT-PCR
	group	No.	Inf.		gene
1	Normal	Normal1	Rancheng Deng		RBM47
2	Normal	Normal2	Zhiliang Xu		TP53INP1
3	Normal	Normal3	Xunwei Wang		TUBB
4	Normal	Normal4	Yuanfu Wen
5	Normal	Normal5	Fan Luo
6	Disease	Disease1	Shengtian Xu
7	Disease	Disease2	Haoran Yang
8	Disease	Disease3	Shaobo Long
9	Disease	Disease4	Laiqun Luo
10	Disease	Disease5	Wenhui He
plate 1
	1	2	3	4	5	6	7	8	9	10	11	12
A	RBM47+ 1	RBM47+ 1	RBM47+ 1	RBM47+ 2	RBM47+ 2	RBM47+ 2	RBM47+ 3	RBM47+ 3	RBM47+ 3	RBM47+ 4	RBM47+ 4	RBM47+ 4
B	TP53INP1 + 1	TP53INP1 + 1	TP53INP1 + 1	TP53INP1 + 2	TP53INP1 + 2	TP53INP1 + 2	TP53INP1 + 3	TP53INP1 + 3	TP53INP1 + 3	TP53INP1 + 4	TP53INP1 + 4	TP53INP1 + 4
C	TUBB + 1	TUBB + 1	TUBB + 1	TUBB + 2	TUBB + 2	TUBB + 2	TUBB + 3	TUBB + 3	TUBB + 3	TUBB + 4	TUBB + 4	TUBB + 4
D	GAPDH + 1	GAPDH + 1	GAPDH + 1	GAPDH + 2	GAPDH + 2	GAPDH + 2	GAPDH + 3	GAPDH + 3	GAPDH + 3	GAPDH + 4	GAPDH + 4	GAPDH + 4
E	RBM47+ 5	RBM47+ 5	RBM47+ 5	RBM47+ 6	RBM47+ 6	RBM47+ 6	RBM47+ 7	RBM47+ 7	RBM47+ 7	RBM47+ 8	RBM47+ 8	RBM47+ 8
F	TP53INP1 + 5	TP53INP1 + 5	TP53INP1 + 5	TP53INP1 + 6	TP53INP1 + 6	TP53INP1 + 6	TP53INP1 + 7	TP53INP1 + 7	TP53INP1 + 7	TP53INP1 + 8	TP53INP1 + 8	TP53INP1 + 8
G	TUBB + 5	TUBB + 5	TUBB + 5	TUBB + 6	TUBB + 6	TUBB + 6	TUBB + 7	TUBB + 7	TUBB + 7	TUBB + 8	TUBB + 8	TUBB + 8
H	GAPDH + 5	GAPDH + 5	GAPDH + 5	GAPDH + 6	GAPDH + 6	GAPDH + 6	GAPDH + 7	GAPDH + 7	GAPDH + 7	GAPDH + 8	GAPDH + 8	GAPDH + 8
plate 2
	1	2	3	4	5	6	7	8	9	10	11	12
A
B
C
D
E	RBM47+ 9	RBM47+ 9	RBM47+ 9	RBM47+ 10	RBM47+ 10	RBM47+ 10
F	TP53INP1 + 9	TP53INP1 + 9	TP53INP1 + 9	TP53INP1 + 10	TP53INP1 + 10	TP53INP1 + 10
G	TUBB + 9	TUBB + 9	TUBB + 9	TUBB + 10	TUBB + 10	TUBB + 10
H	GAPDH + 9	GAPDH + 9	GAPDH + 9	GAPDH + 10	GAPDH + 10	GAPDH + 10

## Sheet: Supplementary Table2
Supplementary Table 2: The cycle threshold (CT) results of three biomarkers by qRT-PCR
plate 1
	1	2	3	4	5	6	7	8	9	10	11	12
A	21.1063	21.0923	20.8318	20.5115	20.3122	20.2149	22.1685	22.406	22.3184	20.8624	20.4714	20.6682
B	21.346	20.1624	19.9691	18.8709	18.5682	18.5186	20.0228	20.0782	20.1553	19.3796	19.4098	19.5604
C	26.2627	25.9275	25.2155	23.5386	23.4855	23.5027	25.1963	25.225	25.3194	23.9944	24.2287	24.0895
D	16.1389	16.0183	16.0333	15.4329	15.2735	15.2741	16.5644	16.8567	16.7213	15.5661	15.763	15.8325
E	22.3945	22.2838	22.1759	25.8092	26.0912	25.8395	28.9175	27.4582	29.1211	19.221	19.2545	19.3188
F	20.5747	20.1957	20.3403	24.0674	24.2481	24.5196	25.0479	25.2025	25.4297	17.0125	17.0818	17.0847
G	26.6135	26.3754	26.5417	27.1784	26.8878	27.1868	28.2126	28.2182	28.4997	23.338	23.2517	23.2097
H	18.0382	18.0175	17.8458	23.1373	22.3491	22.4688	24.177	23.277	23.8355	15.1833	15.4519	15.3346
plate 2
	1	2	3	4	5	6	7	8	9	10	11	12
A
B
C
D
E	20.132	19.8222	19.8014	19.1299	18.8321	18.886
F	19.3267	18.9409	19.2661	17.8413	17.5901	17.7824
G	17.3267	17.9409	17.2661	17.8413	17.5901	17.7824
H	15.0476	15.1115	15.1243	15.832	15.7111	15.6492

## Sheet: Supplemenntary Table3
Supplementary Table 3: The results of three biomarkers by qRT-PCR
	TDO2			TP53INP1			TUBB				H-GAPDH				Intrinsic mean
Normal1	21.1063	21.0923	20.8318	21.346	20.1624	19.9691	26.2627	25.9275	25.2155		16.1389	16.0183	16.0333		16.0635
Normal2	20.5115	20.3122	20.2149	18.8709	18.5682	18.5186	23.5386	23.4855	23.5027		15.4329	15.2735	15.2741		15.3268
Normal3	22.1685	22.406	22.3184	20.0228	20.0782	20.1553	25.1963	25.225	25.3194		16.5644	16.8567	16.7213		16.7141
Normal4	20.8624	20.4714	20.6682	19.3796	19.4098	19.5604	23.9944	24.2287	24.0895		15.5661	15.763	15.8325		15.7205
Normal5	22.3945	22.2838	22.1759	20.5747	20.1957	20.3403	26.6135	26.3754	26.5417		18.0382	18.0175	17.8458		17.9671
Disease1	25.8092	26.0912	25.8395	24.0674	24.2481	24.5196	27.1784	26.8878	27.1868		23.1373	22.3491	22.4688		22.6517
Disease2	28.9175	27.4582	29.1211	25.0479	25.2025	25.4297	28.2126	28.2182	28.4997		24.177	23.277	23.8355		23.7632
Disease3	19.221	19.2545	19.3188	17.0125	17.0818	17.0847	23.338	23.2517	23.2097		15.1833	15.4519	15.3346		15.3233
Disease4	20.132	19.8222	19.8014	17.3267	17.9409	17.2661	23.5932	23.7194	23.4062		15.0476	15.1115	15.1243		15.0945
Disease5	19.1299	18.8321	18.886	17.8413	17.5901	17.7824	23.7915	23.5572	23.5384		15.832	15.7111	15.6492		15.7308
	∆CT=CT Objective gene - CT reference gene mean
Normal1	5.04278	5.02876	4.76831	5.28254	4.0989	3.9056	10.1992	9.86399	9.15204
Normal2	5.18464	4.98538	4.88804	3.54402	3.24139	3.19173	8.21177	8.15862	8.17587
Normal3	5.45441	5.69191	5.60425	3.30868	3.36404	3.4412	8.48217	8.51083	8.60532
Normal4	5.14183	4.75089	4.94769	3.65908	3.68924	3.83982	8.2739	8.50817	8.36896
Normal5	4.42735	4.31662	4.20878	2.60751	2.22851	2.37319	8.64639	8.40827	8.57455
Disease1	3.15748	3.43945	3.18773	1.41568	1.59639	1.86789	4.52669	4.23601	4.53507
Disease2	5.1543	3.69508	5.3579	1.28471	1.4393	1.66651	4.44941	4.45503	4.73652
Disease3	3.89769	3.93125	3.99548	1.68926	1.7585	1.76146	8.01477	7.92842	7.88646
Disease4	5.03749	4.72771	4.70696	2.23218	2.84638	2.17162	8.49872	8.62494	8.31175
Disease5	3.39913	3.10127	3.1552	2.11056	1.85933	2.05165	8.06068	7.8264	7.80762
	∆CT the control group mean
Normal1	4.96278	4.96278	4.96278	3.4517	3.4517	3.4517	8.676	8.676	8.676
Normal2	4.96278	4.96278	4.96278	3.4517	3.4517	3.4517	8.676	8.676	8.676
Normal3	4.96278	4.96278	4.96278	3.4517	3.4517	3.4517	8.676	8.676	8.676
Normal4	4.96278	4.96278	4.96278	3.4517	3.4517	3.4517	8.676	8.676	8.676
Normal5	4.96278	4.96278	4.96278	3.4517	3.4517	3.4517	8.676	8.676	8.676
Normal1	4.96278	4.96278	4.96278	3.4517	3.4517	3.4517	8.676	8.676	8.676
Normal2	4.96278	4.96278	4.96278	3.4517	3.4517	3.4517	8.676	8.676	8.676
Normal3	4.96278	4.96278	4.96278	3.4517	3.4517	3.4517	8.676	8.676	8.676
Normal4	4.96278	4.96278	4.96278	3.4517	3.4517	3.4517	8.676	8.676	8.676
Normal5	4.96278	4.96278	4.96278	3.4517	3.4517	3.4517	8.676	8.676	8.676
	∆∆CT=∆CT the test group-∆CT the control group mean
Normal1	0.0800045	0.0659804	-0.194463	1.83085	0.647207	0.453905	1.52316	1.18799	0.476039
Normal2	0.221863	0.0226004	-0.0747321	0.0923178	-0.210304	-0.259964	-0.464237	-0.517379	-0.500134
Normal3	0.491633	0.729132	0.641471	-0.143022	-0.0876558	-0.010497	-0.193833	-0.165168	-0.0706802
Normal4	0.179053	-0.211884	-0.0150894	0.20738	0.237546	0.388127	-0.402106	-0.167827	-0.307038
Normal5	-0.535421	-0.64615	-0.753997	-0.844187	-1.22319	-1.07851	-0.0296074	-0.267728	-0.10145
Disease1	-1.80529	-1.52332	-1.77504	-2.03602	-1.85531	-1.58381	-4.14931	-4.43999	-4.14094
Disease2	0.191523	-1.2677	0.395125	-2.16699	-2.0124	-1.78519	-4.2266	-4.22097	-3.93949
Disease3	-1.06508	-1.03153	-0.967295	-1.76244	-1.6932	-1.69024	-0.661228	-0.747586	-0.789546
Disease4	0.0747111	-0.235067	-0.255819	-1.21951	-0.605318	-1.28008	-0.177283	-0.0510581	-0.36425
Disease5	-1.56364	-1.8615	-1.80758	-1.34114	-1.59237	-1.40005	-0.615319	-0.849607	-0.868386
	2^-∆∆CT
Normal1	0.946055	0.955296	1.1443	0.2811	0.638515	0.730064	0.347923	0.438915	0.718949
Normal2	0.857457	0.984457	1.05317	0.938015	1.15693	1.19745	1.37959	1.43135	1.41434
Normal3	0.71122	0.603267	0.641059	1.10422	1.06264	1.0073	1.1438	1.1213	1.05021
Normal4	0.883283	1.1582	1.01051	0.866109	0.848187	0.764121	1.32144	1.12337	1.23716
Normal5	1.44937	1.56499	1.68646	1.79525	2.33462	2.11185	1.02073	1.20391	1.07285
Disease1	3.495	2.87452	3.42248	4.10112	3.61829	2.99761	17.7446	21.7055	17.6419
Disease2	0.875681	2.40777	0.760424	4.49085	4.03451	3.44663	18.7211	18.6483	15.3428
Disease3	2.09229	2.04419	1.95517	3.39271	3.23373	3.2271	1.58143	1.67898	1.72853
Disease4	0.949532	1.17696	1.19401	2.32868	1.52131	2.42853	1.13075	1.03602	1.28721
Disease5	2.95599	3.63386	3.50053	2.53351	3.01543	2.6391	1.5319	1.80201	1.82562
				2.72935
	2^-∆∆CT Avg
	TDO2			TP53INP1			TUBB
	Normal	Disease		Normal	Disease		Normal	Disease
1	0.973108	3.12862		0.489915	3.57234		0.4698	17.8125
2	0.925	1.29205		0.977762	3.99066		1.31827	16.446
3	0.624812	1.94633		0.942649	3.28451		1.03436	1.55653
4	0.975136	1.06093		0.73603	2.09284		1.14876	1.07763
5	1.50194	3.22395		1.85364	2.72935		1.02881	1.60975
Avg	1	2.13038		1	3.13394		1	7.70049
SD	0.316102	1.00906		0.515354	0.741017		0.318806	8.62329
	1±0.3161	2.1304±1.9009		1±0.5154	3.1340±0.7410		1±0.3188	7.7005±8.6233
		Normal	Disease	p
	RBM47	1±0.3161	2.1304±1.9009	0.0438
	TP53INP1	1±0.5154	3.1340±0.7410	0.0007
	TUBB	1±0.3188	7.7005±8.6233	0.1207
